# Supplementary material for: Preclinical Development of a Lentiviral Vector for Gene Therapy of X-Linked Severe Combined Immunodeficiency
Source: PubMed Central journal article supplement — Mol Ther Methods Clin Dev. 2018 Mar 10;9:257–69. doi: 10.1016/j.omtm.2018.03.002 (PMC5918176; doi:10.1016/j.omtm.2018.03.002), 2018-03-10
Supplement: mmc1.pdf [file mmc1.pdf]

**OMTM, Volume 9**

**Supplemental Information**

**Preclinical Development of a Lentiviral Vector  
for Gene Therapy of X-Linked Severe Combined  
Immunodeficiency**

**Valentina Poletti, Sabine Charrier, Guillaume Corre, Bernard Gjata, Alban Vignaud, Fang Zhang, Michael Rothe, Axel Schambach, H. Bobby Gaspar, Adrian J. Thrasher, and Fulvio Mavilio**

# Supplemental Figures and Legends, Tables, Methods, and References

## Supplemental Figures

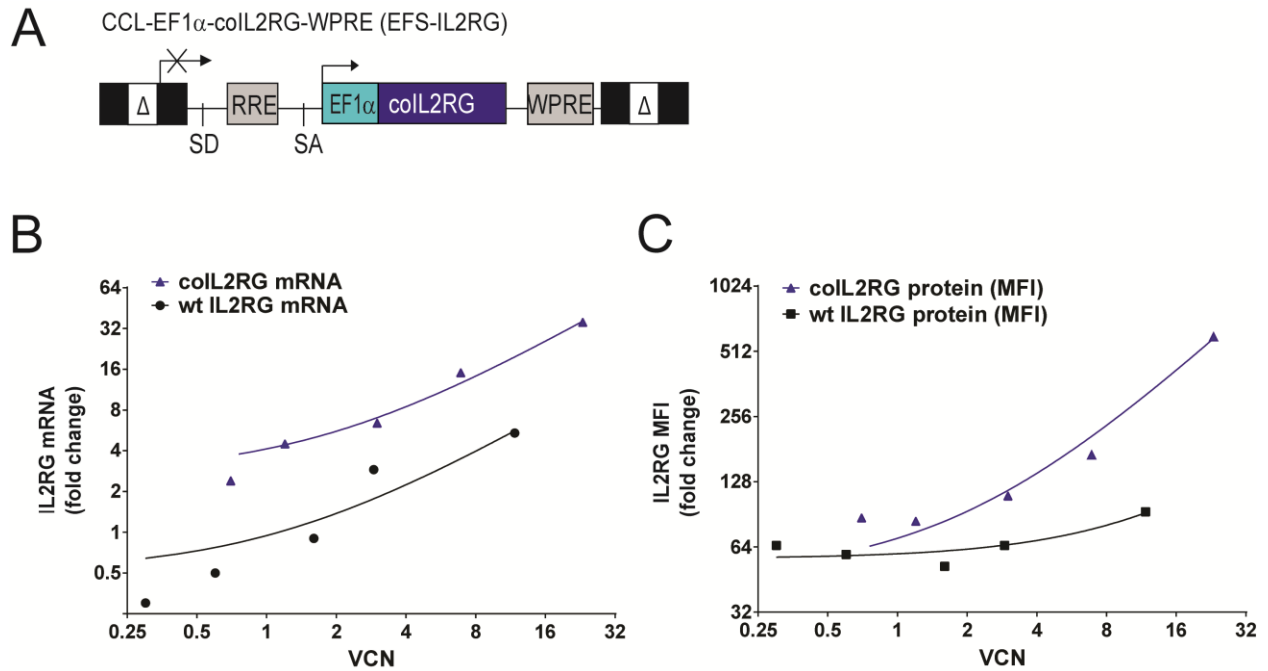

**Figure S1. A.** Scheme of the SIN lentiviral vector containing deleted LTRs ( $\Delta$ ), the short EF1 $\alpha$  promoter (EF1 $\alpha$ ), the codon-optimized version of the IL2RG (coIL2RG), the HIV-1 Rev Responsive Element (RRE), the HIV-1 splicing donor (SD) and acceptor (SA) signals, and a Woodchuck Post-transcriptional Response Element (WPRE). **B.** Relative quantification of the IL2RG mRNA by RT-qPCR (on the left) and protein by flow cytometry (on the right) driven by the codon-optimized (coIL2RG) or wild type (wt) sequence in transduced ED7R cells. Relative mRNA and protein quantification is expressed as fold change with respect to the endogenous IL2RG in Jurkat cells. VCN, Vector Copy Number; MFI, Mean Fluorescence Intensity.

## A Bone marrow

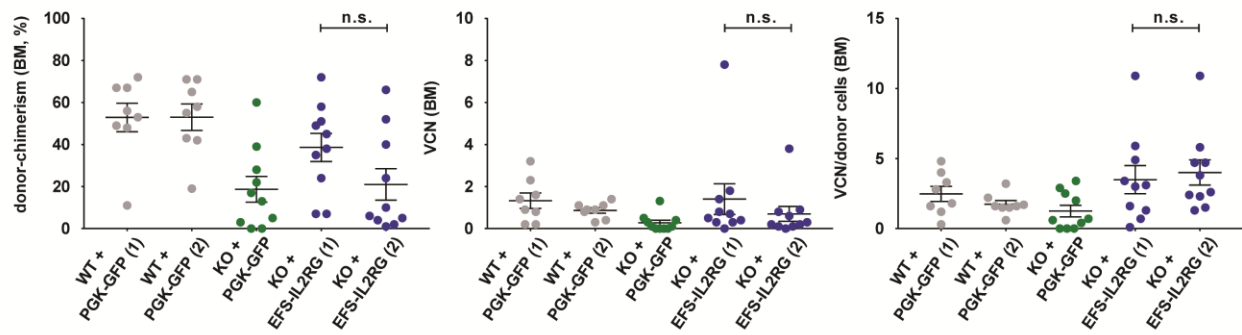

## B Peripheral blood

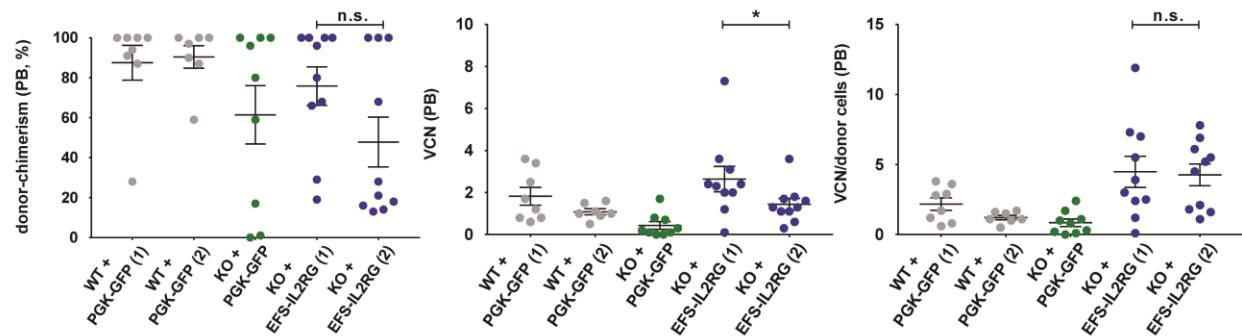

**Figure S2. Transplantation of HSPCs transduced once or twice with the EFS-IL2RG in *Il2rg*-deficient mice.** Chimerism, VCN and VCN/donor cell in the bone marrow (up) and peripheral blood (down) of *Rag2<sup>-/-</sup>/Il2rg<sup>-/-</sup>* mice transplanted with wild-type C56B16 (WT) or *Il2rg<sup>-/-</sup>* (KO) Lin<sup>-</sup> cells transduced once (1) or twice (2) with the EFS-IL2RG vector (KO+EFS-IL2RG) or a PGK-GFP vector (WT+PGK-GFP, KO+PGK-GFP), six months after transplantation. Data are presented as individual animals, and as means  $\pm$  SEM. Statistical differences are expressed as n.s., non-significant, or \*  $p < 0.05$ .

### Blood cell count (6 months)

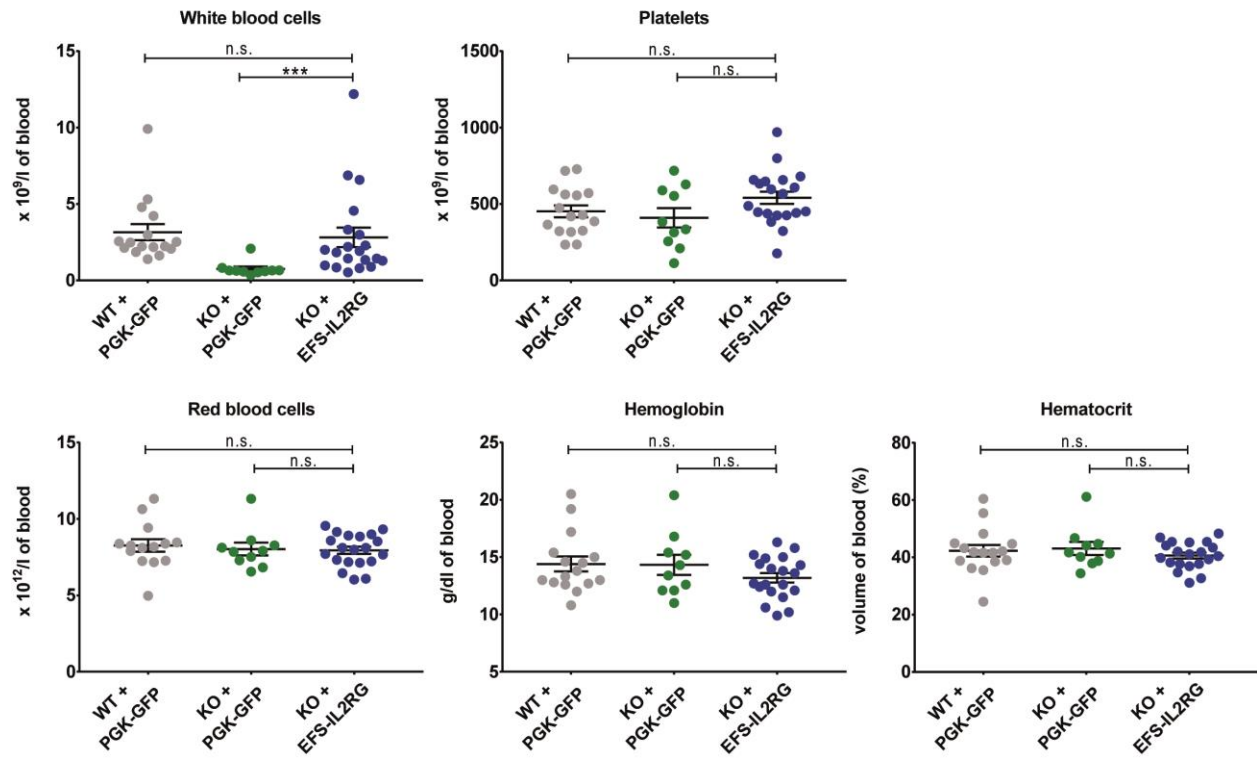

**Figure S3. Blood cell count in *Il2rg*-deficient mice after HSPC-transplantation.** Count of white blood cells, red blood cells and platelets, and quantification of hemoglobin and hematocrit in the blood of *Rag2*<sup>-/-</sup>/*Il2rg*<sup>-/-</sup> mice transplanted with wild-type C56B16 Lin<sup>-</sup> cells transduced with a PGK-GFP vector (WT+PGK-GFP), *Il2rg*<sup>-/-</sup> Lin<sup>-</sup> cells transduced with the PGK-GFP vector (KO+PGK-GFP), and *Il2rg*<sup>-/-</sup> Lin<sup>-</sup> cells transduced with the EFS-IL2RG vector (KO + EFS-IL2RG), six months after transplantation. Data are presented as individual animals, and as means  $\pm$  SEM. Statistical differences are expressed as n.s., non-significant, or \*\*\*  $p < 0.001$ .

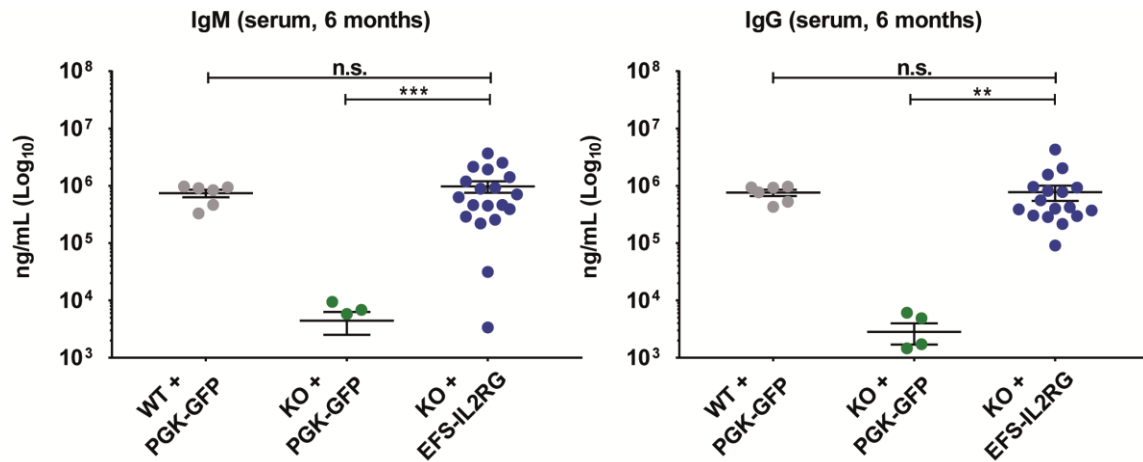

**Figure S4. Serum immunoglobulin in *Il2rg*-deficient mice after HSPC-transplantation.** Level of IgM and IgG in the serum of *Rag2*<sup>-/-</sup>/*Il2rg*<sup>-/-</sup> mice transplanted with wild-type C56B16 Lin<sup>-</sup> cells transduced with a PGK-GFP vector (WT+PGK-GFP), *Il2rg*<sup>-/-</sup> Lin<sup>-</sup> cells transduced with the PGK-GFP vector (KO+PGK-GFP), and *Il2rg*<sup>-/-</sup> Lin<sup>-</sup> cells transduced with the EFS-IL2RG vector (KO + EFS-IL2RG), six months after transplantation. Data are presented as individual animals, and as means ± SEM. Statistical differences are expressed as n.s., non-significant, \*\* p<0.01, \*\*\* p<0.001.

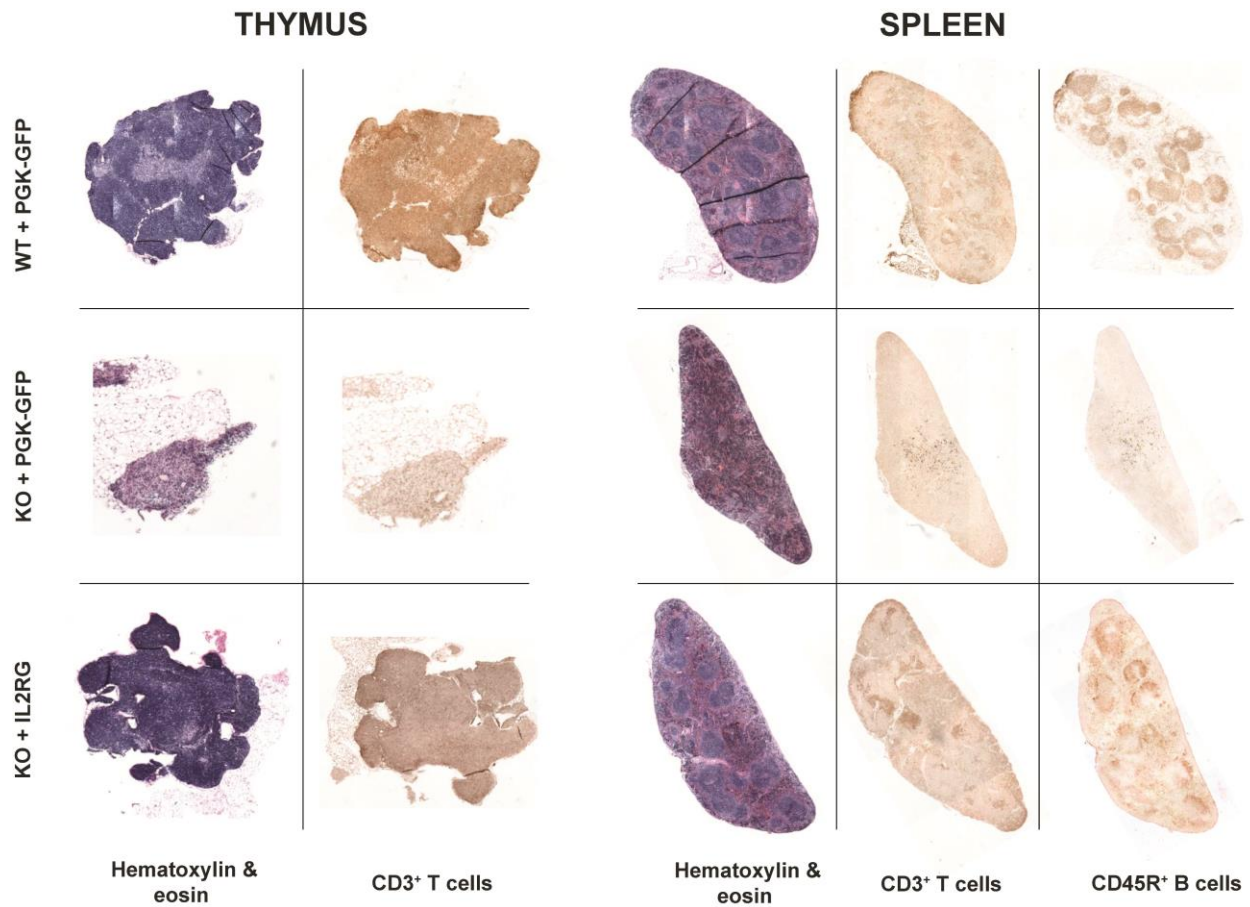

**Figure S5. Histopathological analysis of thymus and spleen of *Il2rg*-deficient mice after HSPC-transplantation.** Staining with Hematoxylin and Eosin, and antibodies against CD3 and CD45R antigens in representative thymus (left) and spleen (right) sections of *Rag2*<sup>-/-</sup>/*Il2rg*<sup>-/-</sup> mice transplanted with wild-type C56B16 Lin<sup>-</sup> cells transduced with a PGK-GFP vector (WT+PGK-GFP), *Il2rg*<sup>-/-</sup> Lin<sup>-</sup> cells transduced with the PGK-GFP vector (KO+PGK-GFP), and *Il2rg*<sup>-/-</sup> Lin<sup>-</sup> cells transduced with the EFS-IL2RG vector (KO + EFS-IL2RG), six months after transplantation.

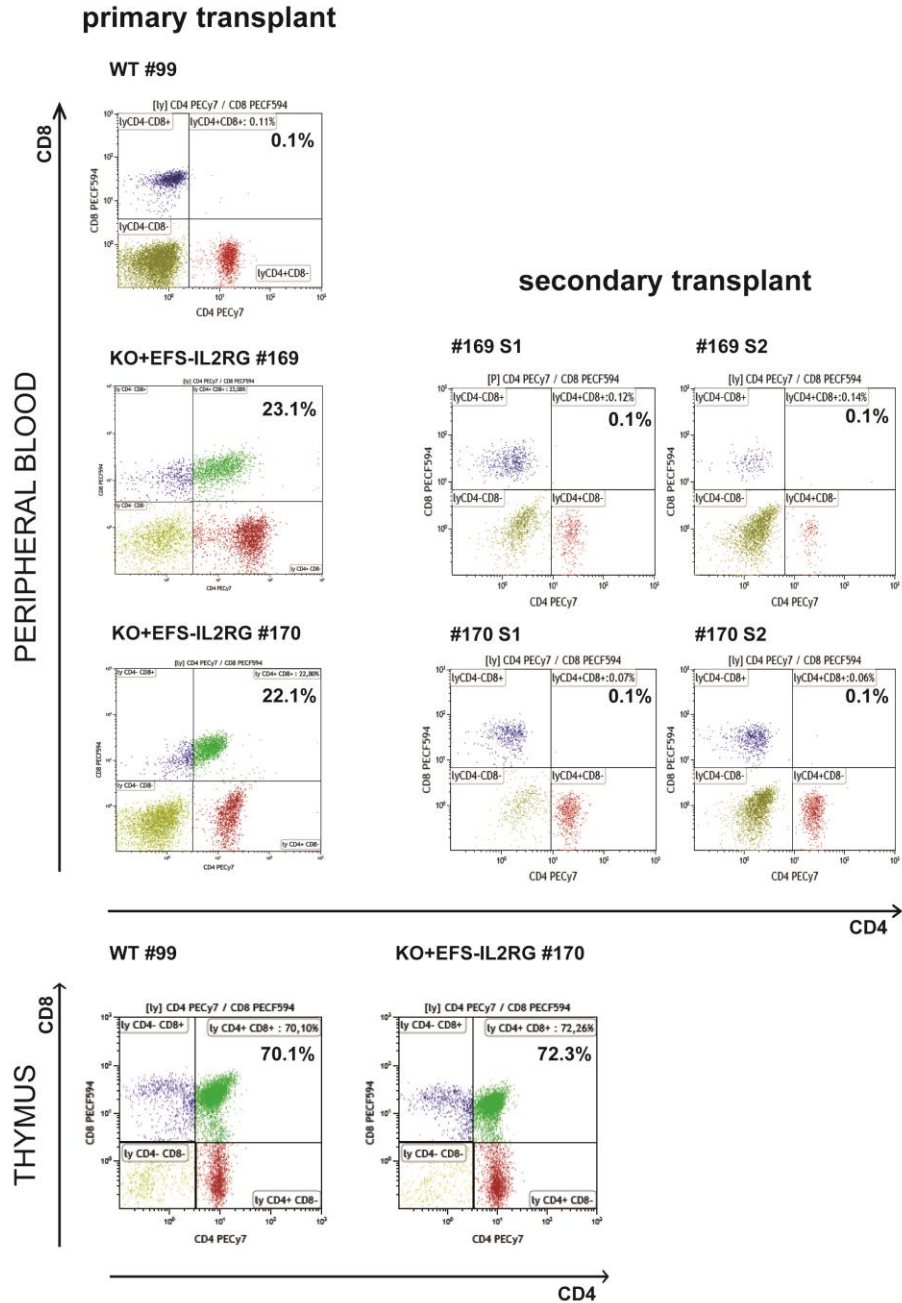

**Figure S6. T-cell phenotype in peripheral blood and thymus of mice #169 and #170.** Flow cytometry analysis of the expression of CD4 (x axis) and CD8 (y axis) in peripheral blood T cells from the *Rag2<sup>-/-</sup>/Il2rg<sup>-/-</sup>* mice #169 and #170 (upper panel, left), transplanted with *Il2rg<sup>-/-</sup>* Lin- cells transduced with the EFS-IL2RG vector (KO+EFS-IL2RG), and of a control mouse transplanted with wt cells (#99). The upper right panels show the same analysis in two mice (S1 and S2) secondarily transplanted with the BM from mice #169 and #170. The bottom panel shows the flow cytometry analysis of the thymus from mouse #170 and from the control mouse #99.

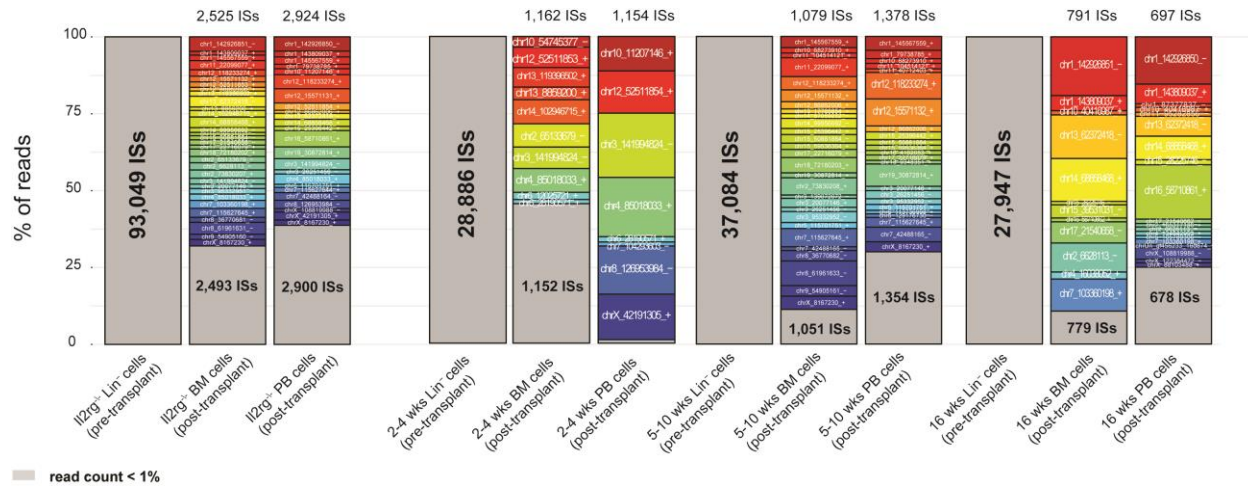

**Figure S7. Integration profile of the EFS-IL2RG vector in individual transduction groups.** ISs were retrieved by LM-PCR and Illumina high-throughput sequencing in pre-transplant Lin<sup>-</sup> cells and post-transplant BM and PB of *Rag2<sup>-/-</sup>/Il2rg<sup>-/-</sup>* mice transplanted with and *Il2rg<sup>-/-</sup>* Lin<sup>-</sup> cells transduced with the EFS-IL2RG vector (see Figure 1). The histograms show the percentage of sequence reads associated to each IS in the pre- and post-transplant BM and PB of mice belonging to each transduction group as pools (2-4 wks, 5-10 wks and 16 wks; right) or the merge of them (left). In each bar, the total number of ISs retrieved is indicated inside (pre-transplant samples) or at the top (post-transplant samples), the fraction of ISs with read count <1% is shown in gray and the corresponding number of ISs is indicated inside the box, while ISs with read count >1% are shown in different colors and identified by their genomic coordinates.



## Supplemental Tables

**Table S1.** RT-qPCR analysis of *Mecom* gene expression in transduced cell clones. The table shows the gene expression ratios of *Mecom*/β-actin for the different expanded clones as calculated by the ΔΔ-Ct-method. The 141203-c1 (highlighted in grey) served as a reference for comparison of fold up- or downregulation. (na, not analyzed).

| Sample ID        | Vector    | CT<br>β-Actin | CT<br>Mecom | ΔCt      | ΔΔCt |
|------------------|-----------|---------------|-------------|----------|------|
| <b>141203-c1</b> | Mock      | 22.88         | 27.52       | 4.00E-02 | 1.00 |
| 141203-c2        | Mock      | 22.83         | 26.79       | 6.44E-02 | 1.61 |
| 141203-c3        | Mock      | na            | na          | na       | na   |
| 141203-c4        | RSF91     | 29.27         | 30.71       | 3.68E-01 | 9.21 |
| 141203-c5        | RSF91     | na            | na          | na       | na   |
| 141203-c12       | EFS-IL2RG | 18.48         | 24.89       | 1.17E-02 | 0.29 |
| 141203-c13       | EFS-IL2RG | 18.20         | 26.64       | 2.88E-03 | 0.07 |
| 141203-c14       | EFS-IL2RG | 18.91         | 27.22       | 3.15E-03 | 0.08 |
| 141203-c15       | EFS-IL2RG | 21.37         | 31.12       | 1.17E-03 | 0.03 |
| 141203-c16       | EFS-IL2RG | na            | na          | na       | na   |
| 141203-c17       | EFS-IL2RG | 20.78         | 29.98       | 1.70E-03 | 0.04 |

**Table S2.** Gene Ontology categories enriched in the pre-transplant *Il2rg*<sup>-/-</sup> Lin<sup>-</sup> cells (all samples). Only categories with a p-value ≤0.05 after Bonferroni correction for false discovery rate are considered significantly enriched.

| GO identifier | GO term                                                 | p-value | Bonferroni-corrected p-value |
|---------------|---------------------------------------------------------|---------|------------------------------|
| GO:0044267    | cellular protein metabolic process                      | 2.2E-40 | 7.5E-37                      |
| GO:0006464    | protein modification process                            | 5.2E-23 | 1.8E-19                      |
| GO:0016070    | RNA metabolic process                                   | 1.6E-21 | 5.4E-18                      |
| GO:0006259    | DNA metabolic process                                   | 5.9E-20 | 2.0E-16                      |
| GO:0030163    | protein catabolic process                               | 6.3E-19 | 2.1E-15                      |
| GO:0043632    | modification-dependent macromolecule catabolic process  | 1.9E-18 | 6.4E-15                      |
| GO:0044257    | cellular protein catabolic process                      | 5.0E-18 | 1.7E-14                      |
| GO:0006396    | RNA processing                                          | 1.2E-15 | 3.8E-12                      |
| GO:0015031    | protein transport                                       | 1.5E-15 | 4.9E-12                      |
| GO:0006281    | DNA repair                                              | 5.1E-14 | 1.8E-10                      |
| GO:0016071    | mRNA metabolic process                                  | 8.6E-13 | 2.9E-09                      |
| GO:0000279    | M phase                                                 | 2.9E-12 | 9.9E-09                      |
| GO:0016310    | phosphorylation                                         | 3.3E-12 | 1.1E-08                      |
| GO:0016568    | chromatin modification                                  | 4.7E-12 | 1.6E-08                      |
| GO:0006397    | mRNA processing                                         | 2.5E-10 | 8.6E-07                      |
| GO:0007242    | intracellular signaling cascade                         | 4.0E-10 | 1.4E-06                      |
| GO:0008380    | RNA splicing                                            | 4.3E-10 | 1.5E-06                      |
| GO:0000087    | M phase of mitotic cell cycle                           | 6.9E-10 | 2.3E-06                      |
| GO:0007067    | mitosis                                                 | 1.8E-09 | 6.1E-06                      |
| GO:0006886    | intracellular protein transport                         | 3.1E-07 | 1.1E-03                      |
| GO:0034660    | ncRNA metabolic process                                 | 5.4E-07 | 1.8E-03                      |
| GO:0051056    | regulation of small GTPase mediated signal transduction | 6.6E-07 | 2.2E-03                      |
| GO:0009966    | regulation of signal transduction                       | 8.4E-07 | 2.9E-03                      |
| GO:0006310    | DNA recombination                                       | 8.5E-07 | 2.9E-03                      |
| GO:0006260    | DNA replication                                         | 1.0E-06 | 3.4E-03                      |
| GO:0051246    | regulation of protein metabolic process                 | 6.7E-06 | 2.3E-02                      |
| GO:0043087    | regulation of GTPase activity                           | 1.1E-05 | 3.6E-02                      |
| GO:0050657    | nucleic acid transport                                  | 1.1E-05 | 3.7E-02                      |
| GO:0050658    | RNA transport                                           | 1.1E-05 | 3.7E-02                      |
| GO:0016311    | dephosphorylation                                       | 1.2E-05 | 3.9E-02                      |
| GO:0030097    | hemopoiesis                                             | 1.4E-05 | 4.8E-02                      |

**Table S3.** KEGG pathways enriched in the pre-transplant *Il2rg*<sup>-/-</sup> Lin<sup>-</sup> cells (all samples). Only categories with a p-value ≤0.05 after Bonferroni correction for false discovery rate are considered significantly enriched.

| GO identifier | GO term                               | p-value | Bonferroni-corrected p-value |
|---------------|---------------------------------------|---------|------------------------------|
| mmu04120      | Ubiquitin mediated proteolysis        | 7.9E-09 | 1.5E-06                      |
| mmu03040      | Spliceosome                           | 2.0E-07 | 3.9E-05                      |
| mmu04144      | Endocytosis                           | 7.8E-07 | 1.5E-04                      |
| mmu04070      | Phosphatidylinositol signaling system | 1.9E-06 | 3.6E-04                      |
| mmu04520      | Adherens junction                     | 6.5E-06 | 1.3E-03                      |
| mmu04660      | T cell receptor signaling pathway     | 6.8E-06 | 1.3E-03                      |
| mmu04662      | B cell receptor signaling pathway     | 2.0E-05 | 3.9E-03                      |
| mmu05211      | Renal cell carcinoma                  | 2.6E-05 | 5.1E-03                      |
| mmu04510      | Focal adhesion                        | 3.1E-05 | 6.1E-03                      |
| mmu00230      | Purine metabolism                     | 4.7E-05 | 9.0E-03                      |
| mmu05221      | Acute myeloid leukemia                | 5.6E-05 | 1.1E-02                      |
| mmu04722      | Neurotrophin signaling pathway        | 6.3E-05 | 1.2E-02                      |
| mmu04666      | Fc gamma R-mediated phagocytosis      | 7.3E-05 | 1.4E-02                      |
| mmu04110      | Cell cycle                            | 1.2E-04 | 2.3E-02                      |
| mmu04114      | Oocyte meiosis                        | 1.2E-04 | 2.3E-02                      |
| mmu04910      | Insulin signaling pathway             | 1.3E-04 | 2.6E-02                      |
| mmu04012      | ErbB signaling pathway                | 1.5E-04 | 2.8E-02                      |
| mmu04720      | Long-term potentiation                | 1.7E-04 | 3.2E-02                      |
| mmu04810      | Regulation of actin cytoskeleton      | 1.7E-04 | 3.2E-02                      |
| mmu05213      | Endometrial cancer                    | 2.3E-04 | 4.4E-02                      |

**Table S4.** List of human and mouse orthologue gene (NCBI HomoloGene definition) over-targeted at statistically significant frequency with respect to random ( $p < 0.001$ ) by the EFS-IL2RG vector in human mobilized peripheral blood (mPB) CD34<sup>+</sup> and murine Lin<sup>-</sup> hematopoietic stem/progenitor cells. Genes are ranked by the number of integrations sites (ISs) retrieved from the two cell types. Genes found frequently targeted in pre- and/or post-transplant hematopoietic cells in LV-based gene therapy clinical trials (see main text) are indicated in bold. The only gene found in common between the two lists (ARAP2) is indicated in red.

| HomoloGene Symbol<br>(human) | # ISs in mPB CD34 <sup>+</sup> cells | HomoloGene Symbol<br>(mouse) | # ISs in wt Lin <sup>-</sup> cells |
|------------------------------|--------------------------------------|------------------------------|------------------------------------|
| <b>KDM2A</b>                 | 61                                   | <i>Dach1</i>                 | 40                                 |
| <b>PACS1</b>                 | 47                                   | <i>Ascc3</i>                 | 33                                 |
| <b>GPATCH8</b>               | 47                                   | <i>Trps1</i>                 | 31                                 |
| <b>FCHSD2</b>                | 45                                   | <i>Tbc1d5</i>                | 31                                 |
| <b>ASH1L</b>                 | 41                                   | <i>Stag1</i>                 | 31                                 |
| <b>EIF4G3</b>                | 38                                   | <i>Diaph3</i>                | 31                                 |
| <b>EHMT1</b>                 | 35                                   | <i>Epha7</i>                 | 27                                 |
| <b>NSD1</b>                  | 32                                   | <i>Zfp407</i>                | 26                                 |
| <b>NFAT5</b>                 | 30                                   | <i>Mycbp2</i>                | 24                                 |
| <b>WNK1</b>                  | 30                                   | <i>Kansl1l</i>               | 24                                 |
| <b>RBM6</b>                  | 30                                   | <i>Cdc73</i>                 | 23                                 |
| <b>ZZEF1</b>                 | 29                                   | <i>Dmxl1</i>                 | 23                                 |
| <b>TNRC6B</b>                | 29                                   | <i>Rb1cc1</i>                | 22                                 |
| <b>IP6K1</b>                 | 28                                   | <i>Smarcad1</i>              | 21                                 |
| <b>NPLOC4</b>                | 27                                   | <i>Wrn</i>                   | 21                                 |
| <b>PBX3</b>                  | 27                                   | <i>Vps13a</i>                | 21                                 |
| <b>PPP6R2</b>                | 27                                   | <i>Phip</i>                  | 21                                 |
| <b>SBF2</b>                  | 27                                   | <i>Spata5</i>                | 21                                 |
| <b>CCDC57</b>                | 27                                   | <i>Phf14</i>                 | 20                                 |
| <b>GRB2</b>                  | 26                                   | <i>Adgrl4</i>                | 20                                 |
| <b>DLG1</b>                  | 26                                   | <i>Cdk13</i>                 | 20                                 |
| <b>STAT5B</b>                | 26                                   | <i>Lyst</i>                  | 19                                 |
| <b>SMG1</b>                  | 26                                   | <i>Ube3a</i>                 | 19                                 |
| <b>ARAP2</b>                 | 25                                   | <i>Stxbp6</i>                | 19                                 |
| <b>RPTOR</b>                 | 25                                   | <i>Lnpep</i>                 | 19                                 |
| <b>NF1</b>                   | 24                                   | <i>Kdm4c</i>                 | 19                                 |
| <b>SPATS2</b>                | 24                                   | <i>Hgf</i>                   | 18                                 |
| <b>VMP1</b>                  | 24                                   | <i>Pot1a</i>                 | 18                                 |
| <b>SETD2</b>                 | 24                                   | <i>Rev3l</i>                 | 18                                 |
| <b>FNBP1</b>                 | 24                                   | <i>Pcm1</i>                  | 17                                 |
| <b>UNK</b>                   | 22                                   | <i>Hjrp</i>                  | 17                                 |
| <b>SMG6</b>                  | 22                                   | <i>Sfi1</i>                  | 17                                 |
| <b>TNRC6C</b>                | 22                                   | <i>Pla2g4a</i>               | 17                                 |
| <b>RTN3</b>                  | 22                                   | <i>Chd6</i>                  | 17                                 |
| <b>NFATC3</b>                | 22                                   | <i>Rbm26</i>                 | 17                                 |
| <b>RFX2</b>                  | 22                                   | <i>Rttm</i>                  | 17                                 |
| <b>ANKRD11</b>               | 22                                   | <i>Arap2</i>                 | 16                                 |
| <b>FOXJ3</b>                 | 21                                   | <i>Pde3b</i>                 | 16                                 |
| <b>SIK3</b>                  | 21                                   | <i>Rasa1</i>                 | 16                                 |
| <b>CAPN1</b>                 | 20                                   | <i>Tsc22d2</i>               | 16                                 |
| <b>BLM</b>                   | 20                                   | <i>Wwp1</i>                  | 16                                 |
| <b>SMARCC1</b>               | 20                                   | <i>Trip12</i>                | 16                                 |
| <b>UBE2G1</b>                | 19                                   | <i>Cnot6l</i>                | 16                                 |
| <b>VAV1</b>                  | 19                                   | <i>Slc4a7</i>                | 15                                 |
| <b>MUM1</b>                  | 19                                   | <i>Uba6</i>                  | 15                                 |

|                |    |                      |    |
|----------------|----|----------------------|----|
| <b>RABL6</b>   | 19 | <i>2310035C23Rik</i> | 15 |
| <b>TAOK1</b>   | 19 | <i>Wls</i>           | 15 |
| <b>METTL16</b> | 19 | <i>Cnot4</i>         | 15 |
| <b>MROH1</b>   | 19 | <i>Arhgap5</i>       | 14 |
| <b>CKAP5</b>   | 18 | <i>Uri1</i>          | 14 |

## Supplemental Materials and Methods

List of primers and probes used for qPCR (VCN, chimerism and IL2RG mRNA evaluation). The suffix h or m indicate human or mouse genome.

| Oligo. name | Type    | Sequence                             |
|-------------|---------|--------------------------------------|
| HIV-Psi     | forward | 5'-CAGGACTCGGCTTGCTGAAG-3'           |
| HIV-Psi     | reverse | 5'-TCCCCCGCTTAATACTGACG-3'           |
| HIV-Psi     | probe   | 5'-CGCACGGCAAGAGGCGAGG-3'            |
| WPRE        | forward | 5'-AGGAGTTGTGGCCCGTTGT-3'            |
| WPRE        | reverse | 5'-TGACAGGTGGTGGCAATGC-3'            |
| WPRE        | probe   | 5'-TGTTTGCTGACGCAACCCCACT-3'         |
| hIL2RG      | forward | 5'-CAGGAGACAGGCCACACAGA-3'           |
| hIL2RG      | reverse | 5'-CACTCAGTTTGTGAAGTGTTAGGTTCT-3'    |
| hIL2RG      | probe   | 5'-CTAAAAGTGCAGAATCTGGTGATCCCCTGG-3' |
| hTFIID      | probe   | 5'-TGTGCACAGGAGCCAAGAGTGAAGA-3'      |
| hTFIID      | forward | 5'-GAGAGCCACGAACCACGG-3'             |
| hTFIID      | reverse | 5'-ACATCACAGCTCCCCACCAT-3'           |
| hALB        | forward | 5'-GCTGTCATCTCTTGTGGGCTGT-3'         |
| hALB        | reverse | 5'-ACTCATGGGAGCTGCTGGTTC-3'          |
| hALB        | probe   | 5'-CCTGTCATGCCCACACAAATCTCTCC-3'     |
| mY          | probe   | 5'-TTCTCCAGGACCAGTGACTGGAGATCA-3'    |
| mY          | forward | 5'-GTGCTAAGGAGTAGAGCGGAGAA-3'        |
| mY          | reverse | 5'-CATGGTAACTGCTCAAGCGGT-3'          |
| mTtn        | probe   | 5'-TGCACGGAAGCGTCTCGTCTCAGTC-3'      |
| mTtn        | forward | 5'-AAAACGAGCAGTGACGTGAGC-3'          |
| mTtn        | reverse | 5'-TTCAGTCATGCTGCTAGCGC-3'           |
| mIL2RG      | forward | 5'-TCGAAGCTGGACGGAACATAATAG-3'       |
| mIL2RG      | reverse | 5'-CTCCGAACCCGAAATGTGTAC-3'          |
| mIL2RG      | probe   | 5'-TGAACCTAGATTCTCCCTGCCTAGTGTGGA-3' |
| mTFIID      | probe   | 5'-TGTGCACAGGAGCCAAGAGTGAAGA-3'      |
| mTFIID      | forward | 5'-ACGGACAAGTGCCTGATTTT-3'           |
| mTFIID      | reverse | 5'-ACTTAGCTGGGAAGCCCAAC-3'           |

List of antibodies used for the immunophenotype analysis in the animal study

| Antibody | Clone    | Fluorochrome | Supplier   | Reference | Isotype                      |
|----------|----------|--------------|------------|-----------|------------------------------|
| CD3      | 145-2C11 | APC          | BD         | 533066    | Ar Ham IgG1, κ               |
| CD4      | RM4-5    | PECy7        | BD         | 552775    | Rat IgG2a, κ                 |
| CD8      | 53-6-7   | ECD          | BC         | A88606    | IgG2a kappa, Rat (LOU/Ws1/M) |
| IgD      | 11-26c   | PE           | southern-B | 1120-09   | Rat IgG2a, κ                 |
| IgM      | 1B4B1    | APC          | southern-B | 1140-11   | Rat IgG1κ                    |
| CD19     | 1D3      | PECy7        | BD         | 552854    | Rat IgG2a, κ                 |
| NK1.1    | PK136    | PE           | BD         | 557391    | Ms IgG2a, κ                  |
| CD11b    | M1/70    | APC          | BD         | 553312    | Rat IgG2b, κ                 |
| TCRgd    | GL3      | PE           | BD         | 553178    | ArHam IgG2, κ                |
| TRCab    | H57-597  | PECy7        | BD         | 560729    | Ar Ham IgG2, λ1              |
| CD44     | IM7      | PE           | BD         | 553134    | Rat IgG2b, κ                 |
| CD25     | 3C7      | APC          | BD         | 558643    | Rat IgG2b, κ                 |

List of primers and probes used for LM-PCR. NNNN represent the 4-bp sample specific tags

| Oligonucleotide               | Sequence                                                    |
|-------------------------------|-------------------------------------------------------------|
| linker-                       | (Phos)TAGTCCCTTAAGCGGAG(AmC7)                               |
| linker+                       | GTAATACGACTCACTATAGGGCTCCGCTTAAGGGAC                        |
| HIV 3' LTR primer             | AGTGCTTCAAGTAGTGTGTGCC                                      |
| Linker primer                 | GTAATACGACTCACTATAGGGC                                      |
| ILLU linker nested tag primer | GTCTCGTGGGCTCGGAGATGTGTATAAGAGACAGAGGGCTCCGCTTAAGGGAC       |
| ILLU H3LTRnest tag primer     | TCGTCGGCAGCGTCAGATGTGTATAAGAGACAGNNNGTCTGTTGTGTGACTCTGGTAAC |

### Bioinformatics pipeline

The bioinformatics pipeline developed for IS identification was based on the SnakeMake workflow manager to call the different programs needed for the trimming, cleaning, filtering, mapping, annotation and reporting steps. R1 reads (forward) from 300bp Paired-end Illumina MiSeq sequencing were firstly demultiplexed by “cutadapt” (DOI:10.14806/ej.17.1.200) and a reference database containing anchored 5' tags (4 bp). We allowed one-mismatch tolerance over the 4 bp, considering that the minimal editing distance between tags is two nucleotides. R1 reads containing the correct tag were counter-selected if containing the provirus sequence or the plasmid sequence, otherwise they were trimmed by skewer for the sequences corresponding to the primer on the viral Long Terminal Repeat (LTR), to the remaining LTR (up to the last 3 nucleotides that are processed later) and the adaptor sequence. For each trimming step, we allowed a mismatch rate of 0.12, a minimal length of 20 bp after trimming, and a minimal match length equal to the sequence length to trim, except for the adaptor, for which the minimal matching length was set to 10 bp and the mismatch rate to 0.3, considering the low quality of the read at the 3' end. Output reads are then trimmed without tolerance for the very end of the LTR (the last three nucleotides GCA) in order to increase the accuracy of the mapping of the adjacent host genome. Then, a filter selected reads  $\geq 20$  bp and an average PHRED quality of 30. Trimmed reads are mapped by bowtie2 (configuration: -N 1 -L 25 -i S,25,0 --score-min L,0,-0.15 --gbar 10) on the GRCh37.75/hg19 (human) or GRCm38/mm10 (mouse) reference genome assembly. Unmapped reads are searched for Tru91restriction (TTAA) site and if present, the upstream sequence before that position is remapped. This step removes concatemers of gDNA fragments that may have been ligated during the library preparation. Again, unmapped read are search for TTA motif, cut and remapped. All mapped outputs from these three steps are collapsed in bam/sam file and processed to remove low MAPQUAL alignments ( $<10$ ), multi-hits alignments (XS bam tag), alignments with mismatches in the first 3 nucleotides (NM bam tag) and IS position is determined from chromosome, mapping position corrected for strand and CIGAR INDELS. Alignments mapping to the same position are collapsed together keeping track of the read count and IS falling in repeated regions are collapsed together to a single position. All IS are then annotated using a RefSeq modified table with consensus transcripts for each gene. Finally, a script performs a reporting file including IS position, genomic annotation, read count and percentage reads from parental step, averaged read length, quality composition, and other additional features.

### Over-targeting gene definition

In order to estimate the over-targeting of a gene in pre-transplant Lin- cells, we compared the targeting frequency experimentally observed to a expected frequency given by a random dataset of IS. Because of the technical procedure used to recover the ISs, proviruses can only be detected if they are in close proximity to a Tru91 restriction site. Therefore, the less Tru91sites are in a genomic region, the less chances we have to retrieve ISs located there. For this reason, the targeting-frequency of a gene is also related to the number and distribution of the intragenic Tru91sites. So, instead of generating random virtual genomic positions in a arbitrary proximity to an Tru91site, we decided to use a corrected random dataset based on Tru91 restriction site coordinates, since every IS can be associated to its closest Tru91 site. For each sample, a number of random Tru91 sites equal to the number of experimental ISs was sampled with replacement 200 times from the whole set of ~19 million restriction site

coordinates (corresponding to 5,330,124 and 5,812,911 intragenic positions in the human and murine genome respectively). For each gene, we computed the average frequency of Tru91 sites detected in all replicates. We use a Poisson distribution with a mean equal to the average computed frequency and extract the probability to observe a higher frequency. Probabilities were corrected for multiple comparisons using the Bonferroni correction. Over-targeted genes were defined as genes associated to a Bonferroni-corrected p value  $\leq 0.001$  and at least 3 experimental ISs.

In post-transplant samples, we determined the differential enrichment in the targeting frequency of any gene, or in any GO or KEGG category, with respect to the pre-transplant datasets. Briefly, for each post-transplant sample, we calculated an expected targeting frequency for each gene by multiple (1,000) random sampling of a comparable number of integrations from the corresponding pre-transplant IS collection. The difference between observed and expected targeting frequency was associated to a p-value for each gene. For the GO or KEGG categories, the DAVID analysis on the list of targeted genes in the post-transplant samples was run using the corresponding pre-transplant lists as background.

### **In vitro immortalization assay (IVIM)**

Mecom gene expression was analyzed in one cell clone transduced with IL2RG which was above the Q1-threshold in the IVIM assay. Cells were expanded from 96-well to 24-well plates for Mock (n=2), RSF91 (n=2) and IL2RG (n=6) assays. After 7 days, total mRNA was isolated with the Direct-zol™ RNA MiniPrep kit (Zymogene). 1 µg of total mRNA was reverse transcribed and analyzed by q-PCR for Mecom gene expression with the forward primer 5'-TGATCAGTGTCCCAAGGCATTT-3' and the reverse primer 5'-ATGTGTCGCTGAAGGTTGCT-3'. The Mecom concentration relative to  $\beta$ -Actin (Mm\_Actb\_1\_SG QuantiTect Primer Assay) was quantified with a StepOnePlus q-PCR device (Applied Biosystems).
